# Supplementary material
Source: PubMed Central journal article supplement (PMC5945549)
Supplement: NIHMS922859-supplement-2.pdf [file NIHMS922859-supplement-2.pdf]

Figure S1

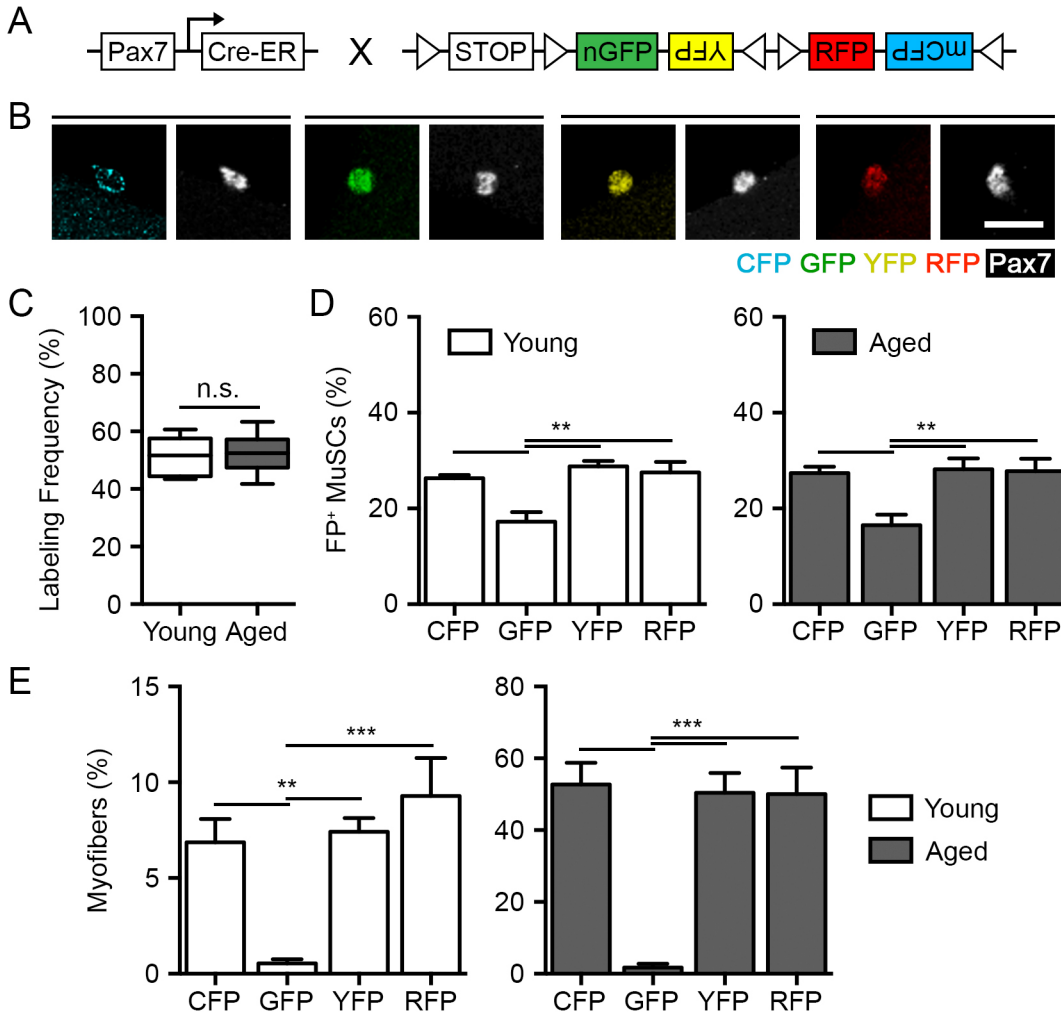

**Figure S1, related to Figure 1.**

**(A)** Scheme of the genetic strategy for multicolor lineage tracing of MuSCs.

**(B)** Images of Pax7<sup>+</sup>FP<sup>+</sup> myofiber-associated MuSCs isolated from young muscles and fixed immediately upon isolation. Scale bar, 20 μm.

**(C)** Quantification of FP<sup>+</sup> labeling frequency in myofiber-associated MuSCs isolated from young and aged muscles and fixed immediately upon isolation (n = 5-6).

**(D-E)** Quantification of the percentage of young and aged freshly isolated myofiber-associated MuSCs and uninjured myofibers expressing each FP in tissue sections (n = 5-6).

Data are represented as average ± SEM (\*\*\*P < 0.001, \*\*P < 0.01).

Figure S2

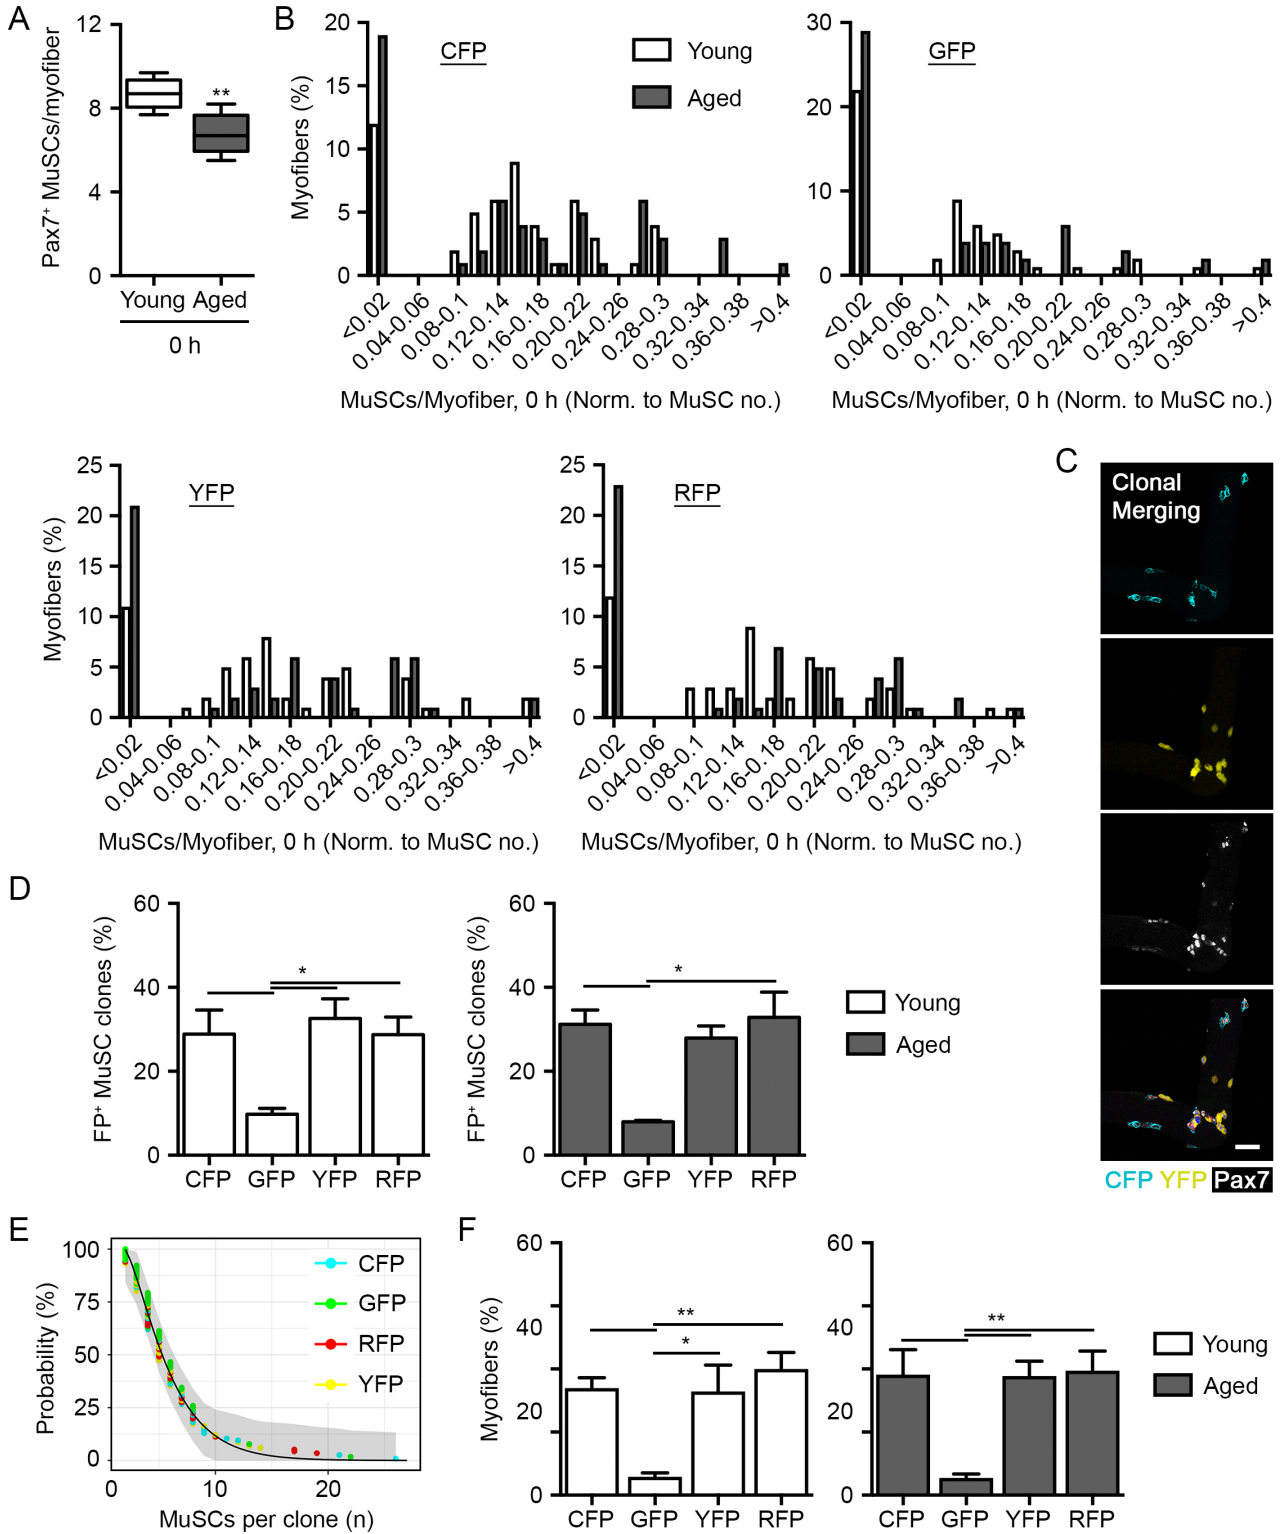

Figure S2, related to Figure 2.

(A) Quantification of Pax7<sup>+</sup> MuSCs per myofiber and fixed immediately upon isolation (n = 5-6).

**(B)** Histogram depicting the local distribution of FP<sup>+</sup> MuSCs within individual young and aged freshly isolated single myofibers (n = 54-56). Gaussian distribution not assumed; statistical comparison using Kolmogorov-Smirnov test (p > 0.05 for all FPs).

**(C)** Example of inter-FP clonal merging in composite images of myofiber-associated MuSCs after 3 d in suspension culture. Scale bar, 50 μm.

**(D)** Quantification of the percentage of young and aged MuSCs expressing each FP 3 d post-BaCl<sub>2</sub> injury (n = 2-3).

**(E)** Young MuSC cumulative clone size distributions for each FP 3 d post-BaCl<sub>2</sub> injury. Shaded area denotes 95% Kolmogorov-Smirnov confidence intervals of empirical distribution.

**(F)** Quantification of the percentage of young and aged regenerating myofibers expressing each FP 25 d post-BaCl<sub>2</sub> injury (n = 5).

Data are represented as average ± SEM (\*\*P < 0.01, \*P < 0.05).

Figure S3

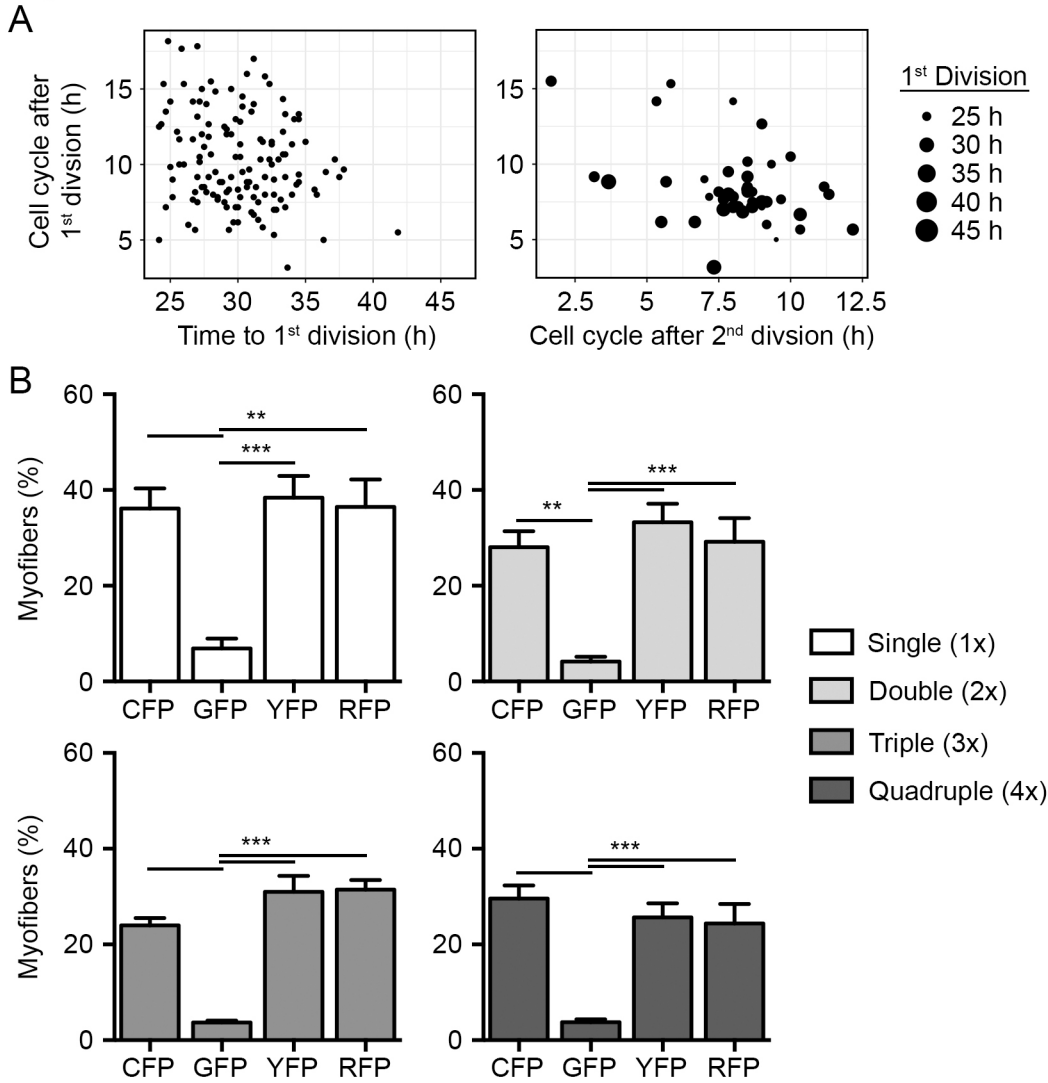

**Figure S3, related to Figure 3.**

(A) Relationship between the time to first division and cell cycle length after the first (left) or second (right) divisions in myofiber-associated MuSCs, obtained from (Siegel et al., 2011).

(B) Quantification of the percentage of young regenerating myofibers expressing each FP following serial BaCl<sub>2</sub> injury (n = 5).

Data are represented as average  $\pm$  SEM (\*\*\*P < 0.001, \*\*P < 0.01).

Figure S4

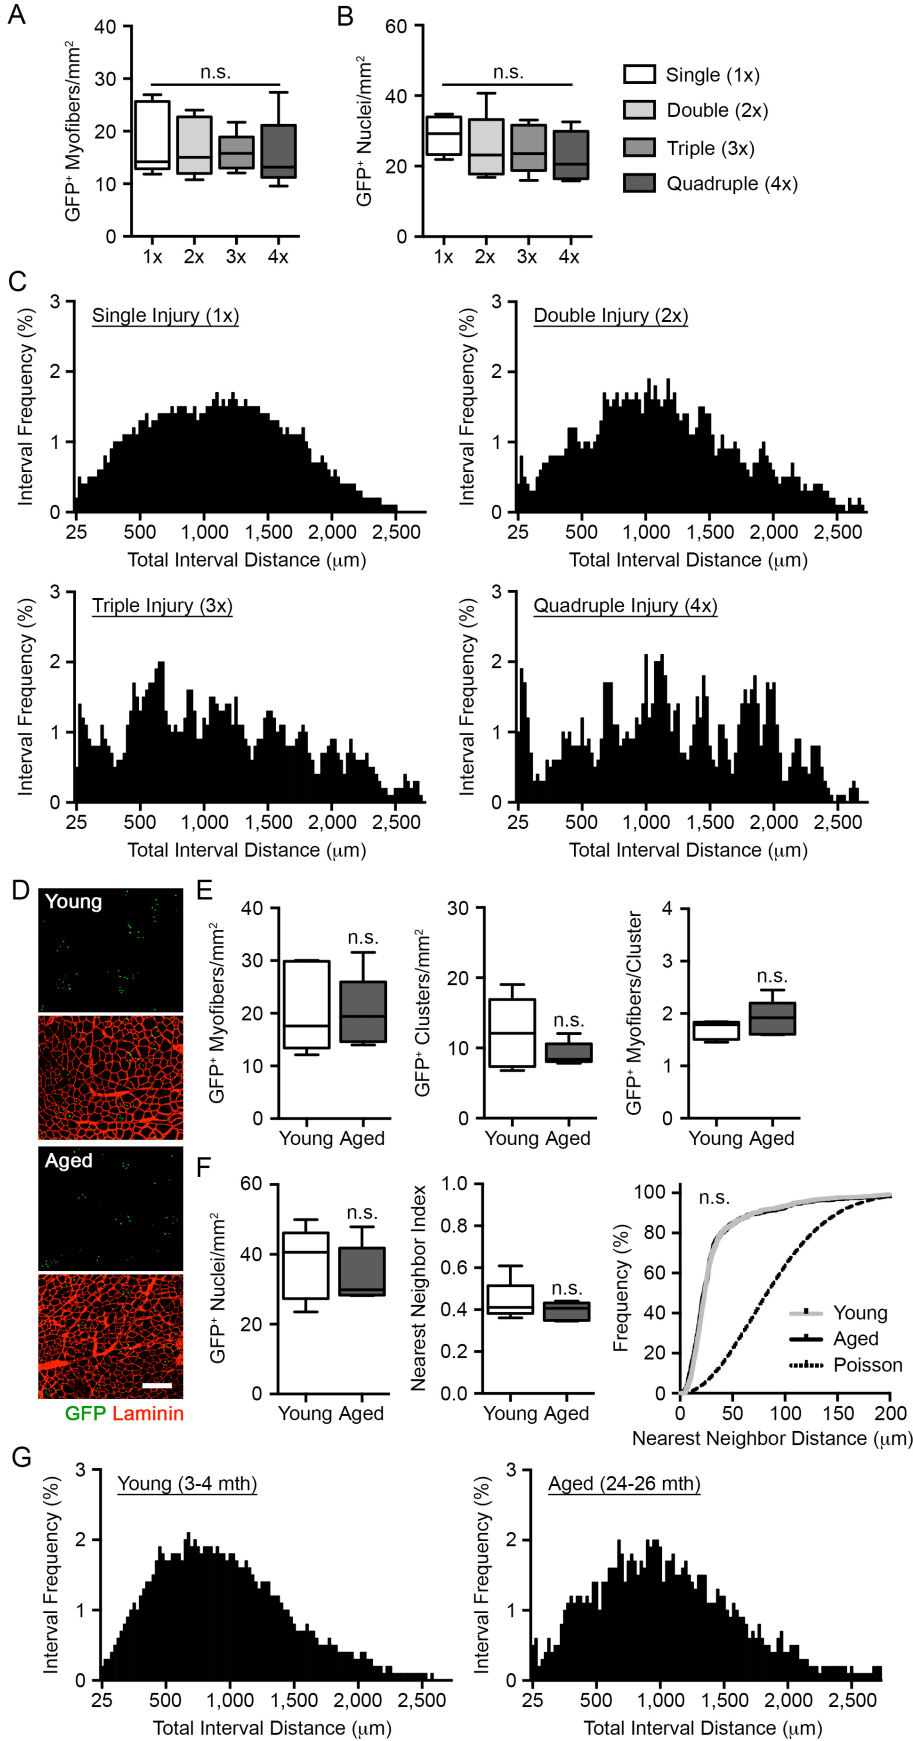

**Figure S4, related to Figure 4.**

(A) Quantification of GFP<sup>+</sup> myofiber density in regenerated muscles following serial BaCl<sub>2</sub> injury (n = 5).

(B) Quantification of GFP<sup>+</sup> nuclei density in regenerated muscles following serial BaCl<sub>2</sub> injury (n = 5).

(C) Representative plots of total distance interval distributions of GFP<sup>+</sup> nuclei following serial BaCl<sub>2</sub> injury (n = 5).

(D) Composite images of GFP<sup>+</sup> myonuclei in young and aged regenerated muscles 25 d post-BaCl<sub>2</sub> injury. Scale bar, 100 μm.

(E) Quantification of GFP<sup>+</sup> myofiber density (left), myofiber cluster density (center) and the number of regenerated myofibers per cluster (right) in young and aged muscles 25 d post-BaCl<sub>2</sub> injury (n = 5).

(F) Quantification of GFP<sup>+</sup> nuclei density (left), nearest neighbor index (center) and cumulative distribution frequency (right) derived from spatial analyses in young and aged muscles 25 d post-BaCl<sub>2</sub> injury (n = 5).

(G) Representative plots of total distance interval distributions of GFP<sup>+</sup> nuclei in young and aged muscles 25 d post-BaCl<sub>2</sub> injury (n = 5).

Data are represented as average ± SEM (P > 0.05).
